# Supplementary material
Source: MDPI journal article supplement (https://www.mdpi.com/2073-4344/13/5/874)
Supplement: s1 [file s1]

## Porous Hybrid PVDF/BiFeO<sub>3</sub> Smart Composite with Magnetic, Piezophotocatalytic, and Light-Emission Properties

Farid Orudzhev <sup>1,2,3,\*</sup>, Nariman Alikhanov <sup>1,3</sup>, Abdulkarim Amirov <sup>1,3</sup>, Alina Rabadanova <sup>1</sup>, Daud Selimov <sup>1</sup>, Abdulatip Shuaibov <sup>1</sup>, Rashid Gulakhmedov <sup>1</sup>, Magomed Abdurakhmanov <sup>1</sup>, Asiyat Magomedova <sup>1</sup>, Shikhgasan Ramazanov <sup>3</sup>, Dinara Sobola <sup>1</sup>, Kamal Giraev <sup>1</sup>, Akhmed Amirov <sup>3</sup>, Kamil Rabadanov <sup>3</sup>, Sultanakhmed Gadzhimagomedov <sup>1</sup>, Rabadanov Murtazali <sup>1</sup> and Valeria Rodionova <sup>2</sup>

1 Smart Materials Laboratory, Dagestan State University, St. M. Gadjieva 43-a, Dagestan Republic, Makhachkala 367015, Russia

2 REC Smart Materials and Biomedical Applications, Immanuel Kant Baltic Federal University, Kaliningrad 236041, Russia

3 Amirkhanov Institute of Physics, Dagestan Federal Research Center, Russian Academy of Sciences, Makhachkala 367003, Russia

\* Correspondence: ff.orudzhev@dgu.ru

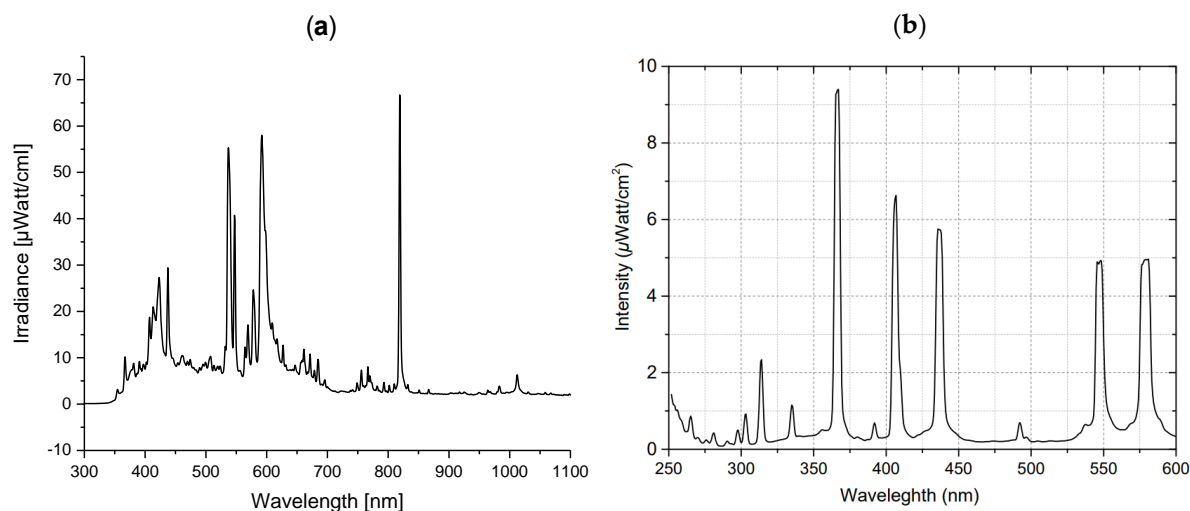

**Figure S1.** Emission spectra (a)—70 W metal halide lamp used as a source of visible light, (b)—250 W discharge mercury vapor lamp with a preliminary removed phosphor layer.

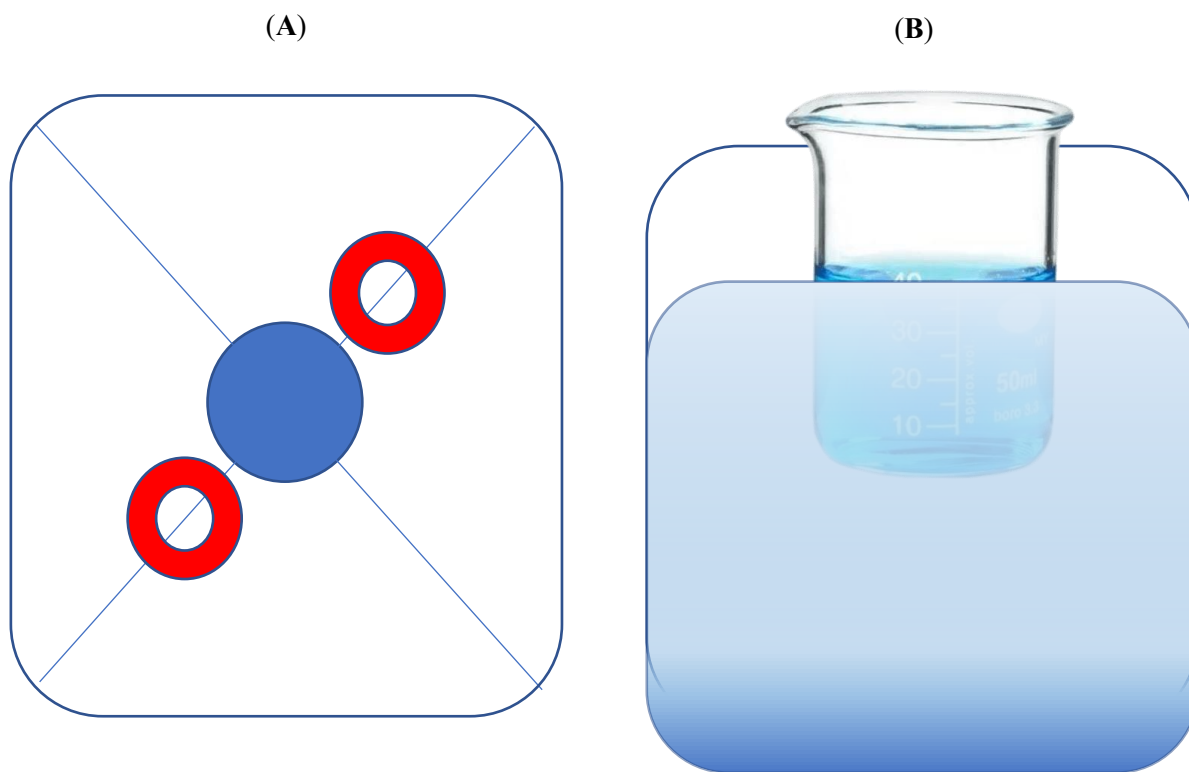

**Figure S2.** Scheme of the location of the glass in the ultrasonic bath. **(A)** Top view **(B)** Side view.

The figure shows a schematic representation of a piezocatalytic experiment. The scale is not maintained. Inner tank size is  $150 \times 135 \times 100$  mm. Chemical baker size is  $60 \times 45$  mm. The red color indicates the location of the piezoelectric emitters. 1.5 L of water was poured into the bathroom. The glass was lowered into the bath to the level of the solution.

Signal measurements of the manufactured PENG were made using the Arduino UNO R3 programmable board in the Arduino 1.8.19 application, a 2 M $\Omega$  resistor was also used in the circuit to eliminate unwanted noise Figure S3.

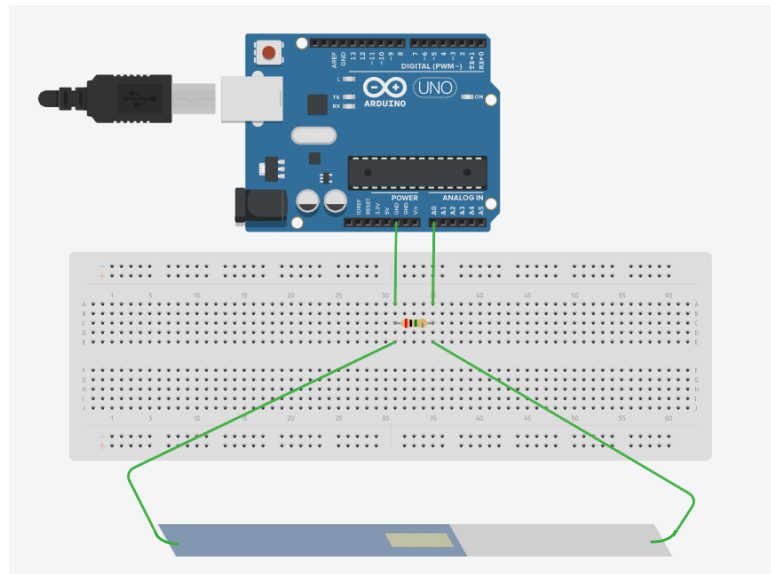

**Figure S3.** Scheme of signal measurements of the manufactured PENG.

The program that reads and converts the input signals to the Arduino microcontroller into voltage was written using Chat GPT, to extract the obtained values, the program for writing Arduino serial output to CSV/Excel (Windows/Mac/Linux) downloaded from the site was used: <https://circuitjournal.com/arduino-serial-to-spreadsheet>.

```
// Declaring Variables
int pin = A0;           // Pin to which the voltage is connected
int delayTime = 50;     // Delay between reads
int readings[10];       // Array with values for smoothing
int index = 0;          // Index for the array
float voltage = 0.0;    // Variable for voltage storage

void setup() {
  Serial.begin(2000000); // Initialization the communication port
}

void loop() {

  // Read the voltage from the ADC
  int reading = analogRead(pin);

  // Adding the read value to the array
  readings[index] = reading;

  // Increasing the index
  index++;
}
```

```
// If the index is greater than 9, then set it to 0
if (index > 9) {
    index = 0;
}

// Adding up 10 read values
int total = 0;
for (int i = 0; i < 10; i++) {
    total += readings[i];
}

// Find the arithmetic mean of 10 read values
float average = total / 10.0;

// Calculate the voltage
voltage = average * (5.0 / 1023.0);

// Output voltage and running average values
Serial.print("Voltage: ");
Serial.print(voltage);
Serial.print("V, Running Average: ");
Serial.println(average);

// Delay
delay(delayTime);
}
```

**Table S1.** Comparison table for piezocatalysis.

| #  | Catalyst                                                  | Pollutant                                                                              | Exp Setup             | Time    | Deg effic |           |
|----|-----------------------------------------------------------|----------------------------------------------------------------------------------------|-----------------------|---------|-----------|-----------|
| 1. | PVDF + WS <sub>2</sub>                                    | MB dye (2.5 mg L <sup>-1</sup> )                                                       | -----                 | 240 min | 44%       | [1]       |
| 2. | E-MoS <sub>2</sub> /PVDF EFMs                             | Oxytetracycline 20 mg/L                                                                | 20 kHz 650 W          | 24 min  | 93.08%    | [2]       |
| 3. | Ag@LiNbO <sub>3</sub> /PVDF<br>diameter of 2.5 cm         | MB, 5,<br>V 10 mL                                                                      | 70 W power and 40 kHz | 120 min | 89        | [3]       |
| 4. | MoS <sub>2</sub> -PVDF<br>2 cm × 2 cm and thickness 50 µm | Acridine orange,<br>Eosin Y,<br>Ethidium bromide<br>Rhodamine B<br><br>10 mL<br>10 ppm | 100W                  | 20 min  | >90%      | [4]       |
| 5. | ZnO@PVDF<br>diameter of 3 cm                              | MO<br>5 mL<br>5 ppm                                                                    | 80 kHz,<br>700 W      | 360 min | 55.29%    | [5]       |
| 6. | PVDF–BaTiO <sub>3</sub><br>2.5 cm × 2.5 cm × 2 mm         | 30 mL RhB solution (10 mg L <sup>-1</sup> )                                            | 180 W                 | 80 min  | 87%       | [6]       |
| 7. | PVDF-ZnSnO <sub>3</sub> -Co <sub>3</sub> O <sub>4</sub>   | 30 mL of 5 mg/pL MB                                                                    | 120 W 33±3 kHz        | 20 min  | 100%      | [7]       |
| 8. | PVDF/CTAB<br>3-1 cm <sup>2</sup>                          | 20 ml MB<br>1mgL                                                                       | 250 W 18kHz           | 60 min  | 73%       | [8]       |
| 9. | PVDF@Ag-ZnO/Au                                            | rhodamine B (RhB) and malachite green (MG)<br>10mg/L<br>50ml                           | 200 W;<br>40 kHz      | 120 min | ~35%      | [9]       |
| 10 | PVDF/BFO                                                  | 20 ml MB<br>1mgL                                                                       | 120 W 40 kHz          | 60 min  | 95%       | This work |

## References

1. Verma, S.; Sharma, M.; Vaish, R. Photo-piezocatalysis in electrospun PVDF + WS<sub>2</sub> membrane. *Environ. Sci. Nano* **2022**, *9*, 3885–3899, doi:10.1039/D2EN00699E.

2. Ma, W.; Yao, B.; Zhang, W.; He, Y.; Yu, Y.; Niu, J. Fabrication of PVDF-based piezocatalytic active membrane with enhanced oxytetracycline degradation efficiency through embedding few-layer E-MoS<sub>2</sub> nanosheets. *Chem. Eng. J.* **2021**, *415*, 129000, doi:10.1016/J.CEJ.2021.129000.
3. Singh, G.; Sharma, M.; Vaish, R. Flexible Ag@LiNbO<sub>3</sub>/PVDF Composite Film for Piezocatalytic Dye/Pharmaceutical Degradation and Bacterial Disinfection. *ACS Appl. Mater. Interfaces* **2021**, *13*, 22914–22925, doi:10.1021/ACSAMI.1C01314.
4. Bagchi, B.; Hoque, N.A.; Janowicz, N.; Das, S.; Tiwari, M.K. Re-usable self-poled piezoelectric/piezocatalytic films with exceptional energy harvesting and water remediation capability. *Nano Energy* **2020**, *78*, 105339, doi:10.1016/J.NANOEN.2020.105339.
5. Jiang, B.; Xue, X.; Mu, Z.; Zhang, H.; Li, F.; Liu, K.; Wang, W.; Zhang, Y.; Li, W.; Yang, C.; et al. Contact-Piezoelectric Bi-Catalysis of an Electrospun ZnO@PVDF Composite Membrane for Dye Decomposition. *Mol.* **2022**, Vol. 27, Page 8579 **2022**, *27*, 8579, doi:10.3390/MOLECULES27238579.
6. Shi, J.; Zeng, W.; Dai, Z.; Wang, L.; Wang, Q.; Lin, S.; Xiong, Y.; Yang, S.; Shang, S.; Chen, W.; et al. Piezocatalytic Foam for Highly Efficient Degradation of Aqueous Organics. *Small Sci.* **2021**, *1*, 2000011, doi:10.1002/SMSC.202000011.
7. Raju, T.D.; Veeralingam, S.; Badhulika, S. Polyvinylidene Fluoride/ZnSnO<sub>3</sub> Nanocube/Co<sub>3</sub>O<sub>4</sub> Nanoparticle Thermoplastic Composites for Ultrasound-Assisted Piezo-Catalytic Dye Degradation. *ACS Appl. Nano Mater.* **2020**, *3*, 4777–4787, doi:10.1021/ACSANM.0C00771.
8. Rabadanova, A.; Rabadanova, A.; Abdurakhmanov, M.; Gulakhmedov, R.; Shuaibov, A.; Selimov, D.; Sobola, D.; Částková, K.; Ramazanov, S.; Orudzhev, F. Piezo-, photo- and piezophotocatalytic activity of electrospun fibrous PVDF/CTAB membrane. *Chim. Techno Acta* **2022**, *9*, 20229420, doi:10.15826/chimtech.2022.9.4.20.
9. Li, F.; Shan, B.; Zhao, X.; Ji, C.; Li, Z.; Yu, J., ... & Man, B.. Plasmonic enhanced piezoelectric photoresponse with flexible PVDF@ Ag-ZnO/Au composite nanofiber membranes. *Optics Express* **2022**, *30*(18), 32509-32527. doi: 10.1364/OE.469182
